# Supplementary material for: Comparative Clinicopathologic Characteristics and Outcomes of Paediatric and Adult Xp11 Translocation Renal Cell Carcinomas: a Retrospective Multicentre Study in China
Source: PubMed Central journal article supplement (PMC7010786; doi:10.1038/s41598-020-59162-5), 2020-02-10
Supplement: 41598_2020_59162_MOESM1_ESM.pdf [file 41598_2020_59162_MOESM1_ESM.pdf]

# Comparative Clinicopathologic Characteristics and Outcomes of Paediatric and Adult Xp11 Translocation Renal Cell Carcinomas: a Retrospective Multicentre Study in China

**Authors:** Wenliang Ma<sup>1</sup>, Ning Liu<sup>2</sup>, Wenyuan Zhuang<sup>2</sup>, Weijian Li<sup>2</sup>, Feng Qu<sup>2</sup>, Jing Sun<sup>3</sup>, Wei Xu<sup>4</sup>, Lihua Zhang<sup>5</sup>, Ruipeng Jia<sup>6</sup>, Linfeng Xu<sup>2</sup>, Xiaozhi Zhao<sup>2</sup>, Xiaogong Li<sup>2</sup>, Gutian Zhang<sup>2</sup>, Hongqian Guo<sup>2</sup>, Dongmei Li<sup>7,8</sup>, Weidong Gan<sup>1,2\*</sup>

**Institutions:** <sup>1</sup>Department of Urology, Drum Tower Clinical Medical School of Nanjing Medical University, Nanjing, Jiangsu, China;

<sup>2</sup>Department of Urology, Nanjing Drum Tower Hospital, The Affiliated Hospital of Nanjing University Medical School, Nanjing, Jiangsu, China;

<sup>3</sup>Department of Oncology, Jiangsu Province Hospital, The First Affiliated Hospital of Nanjing Medical University, Nanjing, Jiangsu, China;

<sup>4</sup>Department of Pathology, Jiangsu Cancer Hospital, The Affiliated Cancer Hospital of Nanjing Medical University, Nanjing, Jiangsu, China;

<sup>5</sup>Department of Pathology, Zhongda Hospital Southeast University, Nanjing, Jiangsu, China;

<sup>6</sup>Department of Urology, Nanjing First Hospital, The Affiliated Nanjing Hospital of Nanjing Medical University, Nanjing, Jiangsu, China;

<sup>7</sup>Immunology and Reproduction Biology Laboratory & State Key Laboratory of Analytical Chemistry for Life Science, Medical School, Nanjing University, Nanjing, Jiangsu, China;

<sup>8</sup>Jiangsu Key Laboratory of Molecular Medicine, Nanjing University, Nanjing, Jiangsu, China

**Corresponding author:** Weidong Gan, Nanjing Drum Tower Hospital, No. 321 Zhongshan Road, Nanjing, Jiangsu Province, People's Republic of China. 210008. Email: [gwd@nju.edu.cn](mailto:gwd@nju.edu.cn). Tel: +86 13305186699; Fax: +86 2583307115

**Supplementary table S1** Survival analysis based on institutions for overall survival (OS) and progression-free survival (PFS) in 85 patients. SE, Standard error; \*No data or insufficient data for statistical analysis.

| Variable                    | One-year    | Five-year   | One-year    | Five-year   | <i>P</i> -value |      |
|-----------------------------|-------------|-------------|-------------|-------------|-----------------|------|
|                             | OS          | OS          | PFS         | PFS         | Log-rank test   |      |
|                             | % (SE)      | % (SE)      | % (SE)      | % (SE)      | OS              | PFS  |
| Institutions                |             |             |             |             | 0.24            | 0.40 |
| Nanjing Drum Tower Hospital | 97.9 (0.02) | 77.9 (0.07) | 76.1 (0.06) | 66.2 (0.07) |                 |      |
| Jiangsu Province Hospital   | 93.3 (0.06) | 73.8 (0.14) | 80.0 (0.10) | 58.3 (0.13) |                 |      |
| Jiangsu Cancer Hospital     | 85.7 (0.13) | 35.7 (0.27) | 71.4 (0.17) | 42.9 (0.19) |                 |      |
| Zhongda Hospital Southeast  | 100         | -*          | 85.7 (0.13) | 85.7 (0.13) |                 |      |
| University                  |             |             |             |             |                 |      |
| Nanjing First Hospital      | 100         | -           | 100         | -           |                 |      |
| Age                         |             |             |             |             | 0.29            | 0.57 |
| Children (<18 years)        | 100         | 83.3 (0.15) | 74.1 (0.13) | 74.1 (0.13) |                 |      |
| Adults (≥18 years)          | 95.6 (0.03) | 75.5 (0.06) | 80.0 (0.05) | 64.0 (0.06) |                 |      |

**Supplementary table S2** Survival analysis based on institutions for overall survival (OS) and progression-free survival (PFS) in adult group. SE, Standard error; \*No data or insufficient data for statistical analysis.

| Variable                    | One-year    | Five-year   | One-year    | Five-year   | <i>P</i> -value |      |
|-----------------------------|-------------|-------------|-------------|-------------|-----------------|------|
|                             | OS          | OS          | PFS         | PFS         | Log-rank test   |      |
|                             | % (SE)      | % (SE)      | % (SE)      | % (SE)      | OS              | PFS  |
| Institutions                |             |             |             |             | 0.40            | 0.45 |
| Nanjing Drum Tower Hospital | 97.6 (0.02) | 78.1 (0.07) | 75.2 (0.07) | 63.7 (0.08) |                 |      |
| Jiangsu Province Hospital   | 92.9 (0.07) | 73.0 (0.14) | 85.7 (0.09) | 62.5 (0.14) |                 |      |
| Jiangsu Cancer Hospital     | 85.7 (0.13) | 35.7 (0.27) | 71.4 (0.17) | 42.9 (0.19) |                 |      |
| Zhongda Hospital Southeast  | 100         | -*          | 100         | -           |                 |      |
| University                  |             |             |             |             |                 |      |
| Nanjing First Hospital      | 100         | -           | 100         | -           |                 |      |

**Supplementary table S3** Multivariable analysis of overall survival and progression-free survival in 85 patients. CI, Confidence interval; HR, Hazard ratio.

| Variable                    | Progression-free survival |        |       |                 | Overall survival |        |       |                 |
|-----------------------------|---------------------------|--------|-------|-----------------|------------------|--------|-------|-----------------|
|                             | HR                        | 95% CI |       | <i>P</i> -value | HR               | 95% CI |       | <i>P</i> -value |
|                             |                           | Lower  | Upper |                 |                  | Lower  | Upper |                 |
| Sex                         | 1.52                      | 0.64   | 3.60  | 0.34            | 1.22             | 0.41   | 3.66  | 0.72            |
| Operation                   | 1.16                      | 0.40   | 3.40  | 0.78            | 0.69             | 0.18   | 2.62  | 0.59            |
| Nuclear grade               | 0.77                      | 0.33   | 1.82  | 0.55            | 0.34             | 0.09   | 1.31  | 0.12            |
| pT stage                    | 0.29                      | 0.07   | 1.16  | 0.08            | 0.81             | 0.11   | 5.96  | 0.84            |
| Local lymph node metastasis | 3.78                      | 1.02   | 14.04 | 0.04            | 0.10             | 0.01   | 0.80  | 0.03            |
| Vena cava tumour thrombosis | 0.64                      | 0.25   | 1.69  | 0.37            | 0.33             | 0.08   | 1.35  | 0.12            |
| Tumour boundary             | 1.26                      | 0.51   | 3.14  | 0.62            | 0.82             | 0.25   | 2.71  | 0.74            |
| Institutions                | 1.04                      | 0.78   | 1.40  | 0.79            | 0.28             | 0.07   | 1.18  | 0.08            |
